# Supplementary material
Source: publisher figshare collection journal article supplement (https://acs.figshare.com/ndownloader/files/3925048)
Supplement: Supplementary file 1 [file 3925048]

**Thermoresponsive Helical Poly(phenylacetylene)s**

Shu Li, Kun Liu, Guichao Kuang\*, Toshio Masuda and Afang Zhang\*

Laboratory of Polymer Chemistry, Department of Polymer Materials, College of Materials Science and Engineering, Shanghai University, Nanchen Street 333, Materials Building Room 447, Shanghai 200444, China. Phone: +86-21-66138053. Fax: +86-21-66131720. E-mails: gckuang@shu.edu.cn (G.K.) and azhang@shu.edu.cn (A.Z.)

## Table of Contents

|                                                                                                                                                                                                                                                                                                                                                                       |     |
|-----------------------------------------------------------------------------------------------------------------------------------------------------------------------------------------------------------------------------------------------------------------------------------------------------------------------------------------------------------------------|-----|
| 1. Experimental Section.....                                                                                                                                                                                                                                                                                                                                          | S3  |
| 2. Scheme S1.....                                                                                                                                                                                                                                                                                                                                                     | S5  |
| 3. Figure S1. $^1\text{H}$ NMR spectra of <b>PPA-OEG</b> in $\text{DMSO}-d_6$ at 40, 60 and 80 $^\circ\text{C}$ , respectively.....                                                                                                                                                                                                                                   | S6  |
| 4. Figure S2. Temperature-varied $^1\text{H}$ NMR spectra of <b>PPA-BDY</b> in $\text{D}_2\text{O}$ (0.31 wt %) ( $T_{\text{op}} = 33.9$ $^\circ\text{C}$ ) .....                                                                                                                                                                                                     | S7  |
| 5. Figure S3. (a) Absorption spectra of <b>PA-BDY</b> ( $1.13 \times 10^{-6}$ mol·L $^{-1}$ ) and <b>PPA-BDY</b> (0.56 mg·mL $^{-1}$ ) in methanol at 25 $^\circ\text{C}$ . (b) Normalized absorption spectra of aliphatic monomer <b>MA-BDY</b> ( $2.09 \times 10^{-5}$ mol·L $^{-1}$ ) and <b>PMA-BDY</b> (0.50 mg·mL $^{-1}$ ) in DCM at 25 $^\circ\text{C}$ ..... | S7  |
| 6. Figure S4. Turbidity curves for <b>PPA-OEG</b> (a, 0.40 wt %) and <b>PPA-BDY</b> (b, 0.31 wt %) in $\text{D}_2\text{O}$ , and <b>PPA-BDY</b> (c, 0.025 wt %) and <b>PMA-BDY</b> (d, 0.10 wt %) in $\text{H}_2\text{O}$ .....                                                                                                                                       | S8  |
| 7. Figure S5. CD and UV/vis spectra for <b>PPA-OEG</b> in methanol at 25 $^\circ\text{C}$ and 40 $^\circ\text{C}$ , respectively.....                                                                                                                                                                                                                                 | S8  |
| 8. Figure S6. CD and UV/vis spectra for 0.025 wt % aqueous solution of <b>PPA-OEG</b> at 25 $^\circ\text{C}$ and 40 $^\circ\text{C}$ . The sample was kept at room temperature for 3 days before measurements.....                                                                                                                                                    | S9  |
| 9. Figure S7. Plots of normalized fluorescence intensity for <b>PPA-BDY</b> at 522 nm and <b>PMA-BDY</b> at 524 nm versus temperature.....                                                                                                                                                                                                                            | S9  |
| 10. Figure S8. $^1\text{H}$ NMR spectrum of compound <b>2</b> in $\text{CDCl}_3$ .....                                                                                                                                                                                                                                                                                | S9  |
| 11. Figure S9. $^1\text{H}$ NMR spectrum of compound <b>3</b> in $\text{CDCl}_3$ .....                                                                                                                                                                                                                                                                                | S10 |
| 12. Figure S10. $^1\text{H}$ NMR spectrum of compound <b>4</b> in $\text{CDCl}_3$ .....                                                                                                                                                                                                                                                                               | S10 |
| 13. Figure S11. $^1\text{H}$ NMR spectrum of compound <b>6</b> in $\text{CDCl}_3$ .....                                                                                                                                                                                                                                                                               | S11 |
| 14. Figure S12. $^1\text{H}$ NMR spectrum of compound <b>7</b> in $\text{CDCl}_3$ .....                                                                                                                                                                                                                                                                               | S11 |
| 15. Figure S13. $^1\text{H}$ NMR spectrum of compound <b>8</b> in $\text{CDCl}_3$ .....                                                                                                                                                                                                                                                                               | S12 |
| 16. Figure S14. $^1\text{H}$ NMR spectrum of compound <b>MA-BDY</b> in $\text{CDCl}_3$ .....                                                                                                                                                                                                                                                                          | S12 |
| 17. Figure S15. $^{13}\text{C}$ NMR spectrum of compound <b>MA-BDY</b> in $\text{CDCl}_3$ .....                                                                                                                                                                                                                                                                       | S13 |
| 18. Figure S16. $^{13}\text{C}$ NMR spectrum of compound <b>PA-OEG</b> in $\text{CDCl}_3$ .....                                                                                                                                                                                                                                                                       | S13 |
| 19. Figure S17. $^1\text{H}$ NMR spectrum of compound <b>PA-Boc</b> in $\text{CDCl}_3$ .....                                                                                                                                                                                                                                                                          | S14 |
| 20. Figure S18. $^1\text{H}$ NMR spectrum of <b>PPA-BDY</b> in $\text{CDCl}_3$ at 50 $^\circ\text{C}$ .....                                                                                                                                                                                                                                                           | S14 |
| 21. Figure S19. $^1\text{H}$ NMR spectrum of <b>PMA-BDY</b> in $\text{CDCl}_3$ at 50 $^\circ\text{C}$ .....                                                                                                                                                                                                                                                           | S15 |

## Experimental Section

The first generation dendritic monomer **MA-G1**<sup>S1</sup> and compound **6**<sup>S2</sup> were prepared according to previous reports.

**Compound 7.** Compound **6** (3.18 g, 19.00 mmol) was dissolved in excess pyrrole (38.52 g, 57.40 mmol). A catalytic amount of TFA (0.22 g, 1.9 mmol) was added, and the mixture was stirred for 22 h at room temperature. The excess of pyrrole was evaporated off, and the residue was purified with chromatograph using hexane/DCM (50:1) as eluent to afford **7** as black solids (2.16 g, 41%). <sup>1</sup>H NMR (CDCl<sub>3</sub>): δ = 3.93-3.95 (m, 2H, CH<sub>2</sub>), 4.05-4.07 (m, 2H, CH<sub>2</sub>), 5.43 (s, H, CH), 5.89-5.91 (m, 2H, pyrrole-H), 6.15 (dd, J = 2.8, 6.0 Hz, 2H, pyrrole-H), 6.68-6.69 (m, 2H, pyrrole-H), 6.85-6.88 (m, 2H, Ar-H), 7.12-7.14 (m, 2H, Ar-H), 7.98 (br, 2H, NH).

**Compound 8.** DCM solution (10 mL) of *p*-chloranil (1.44 g, 6.00 mmol) was added dropwise to DCM solution (15 mL) of compound **7** (1.61 g, 5.71 mmol) at 0 °C. The reaction mixture was stirred at 0 °C for 3 h and then was raised to room temperature. The mixture was stirred at room temperature for another 18 h before DIPEA (8.10 g, 62.8 mmol) and BF<sub>3</sub>·OEt<sub>2</sub> (12.20 g, 85.70 mmol) were added. The solution was stirred at room temperature for 48 h before partitioned between brine and DCM. The organic phase was dried over MgSO<sub>4</sub>. After filtration, the solvent was evaporated *in vacuo*. The residue was purified with chromatograph using hexane/DCM (10:1) as eluent to afford compound **8** as yellow solids (0.67 g, 36%). <sup>1</sup>H NMR (CDCl<sub>3</sub>): δ = 4.03- 4.04 (m, 2H, CH<sub>2</sub>), 4.18-4.20 (m, 2H, CH<sub>2</sub>), 6.55 (d, J = 2.8 Hz, 2H, pyrrole-H), 6.97 (d, J = 3.9 Hz, 2H, pyrrole-H), 7.08 (d, J = 8.6 Hz, 2H, Ar-H), 7.56 (d, J = 8.6 Hz, 2H, Ar-H), 7.92 (s, 2H, pyrrole-H).

**Monomer MA-BDY.** Methacryloyl chloride (0.19 g, 1.80 mmol) in DCM (5 mL) was added dropwise to a solution of **8** (0.30 g, 0.90 mmol), DMAP (0.06 g, 0.18 mmol) and triethylamine (0.27 g, 2.70 mmol) in DCM (20 mL) at 0 °C. The mixture was stirred at room temperature for 13 h before adding methanol to quench the reaction. The mixture solution was concentrated before partitioned between saturated sodium bicarbonate solution and DCM. The organic phase was dried over MgSO<sub>4</sub>. It was purified with chromatograph by

using DCM/MeOH (100:1) as eluent to afford monomer **MA-BDY** as yellow solids (0.21 g, 59%).  $^1\text{H}$  NMR ( $\text{CDCl}_3$ ):  $\delta$  = 1.96-1.97 (m, 3H,  $\text{CH}_3$ ), 4.32-4.34 (m, 2H,  $\text{CH}_2$ ), 4.55-4.56 (m, 2H,  $\text{CH}_2$ ), 5.61-5.62 (m, 1H,  $\text{CH}_2$ ), 6.16-6.17 (m, 1H,  $\text{CH}_2$ ), 6.54 (dd,  $J$  = 1.2, 3.8 Hz, 2H, pyrrole-H), 6.96 (d,  $J$  = 4.1 Hz, 2H, pyrrole-H), 7.06-7.08 (m, 2H, Ar-H), 7.54-7.55 (m, 2H, Ar-H), 7.92 (br, 2H, pyrrole-H).  $^{13}\text{C}$  NMR ( $\text{CDCl}_3$ ),  $\delta$  = 18.30, 62.84, 66.16, 114.69, 118.37, 126.24, 126.60, 126.63, 131.36, 132.44, 134.76, 135.91, 143.45, 147.22, 161.07, 167.23. HRMS (ESI):  $m/z$  calcd for  $\text{C}_{21}\text{H}_{19}\text{BF}_2\text{N}_2$   $[\text{M}+\text{H}]^+$ : 395.1493, found: 395.1496.

Polymer **PMA-BDY**. Monomer **MA-G1** (0.20 g, 0.28 mmol), **MA-BDY** (0.22 mg, 0.58 mol), and AIBN (3 mg) were dissolved in dry DMF (0.10 mL) inside a Schlenk tube. The solution was thoroughly deoxygenated by several freeze-pump-thaw cycles and then stirred at 70 °C for 25 h. After cooling to rt, the polymer was dissolved in DCM, and purified with chromatograph by using DCM as eluent to afford the product as a viscous yellow liquid (0.11 g, 55%).  $^1\text{H}$  NMR ( $\text{CDCl}_3$ , 50 °C):  $\delta$  = 0.82-1.05 (br, 3H,  $\text{CH}_3$ ), 1.14-1.19 (m, 9H,  $\text{CH}_3$ ), 3.47-3.74 (m, 36H,  $\text{CH}_2+\text{CH}_3$ ), 4.04-4.07 (br, 6H,  $\text{CH}_2$ ), 4.77 (br, 2H,  $\text{CH}_2$ ), 6.51 (br, 2H, Ar-H).

## References

- [S1] Li, W.; Zhang, A.; Schlüter, A. D. *Chem. Commun.* **2008**, 5523–5525.  
[S2] Jackson, A. W.; Stakes, C.; Fulton, D. A. *Polym. Chem.* **2011**, 2, 2500–2511.

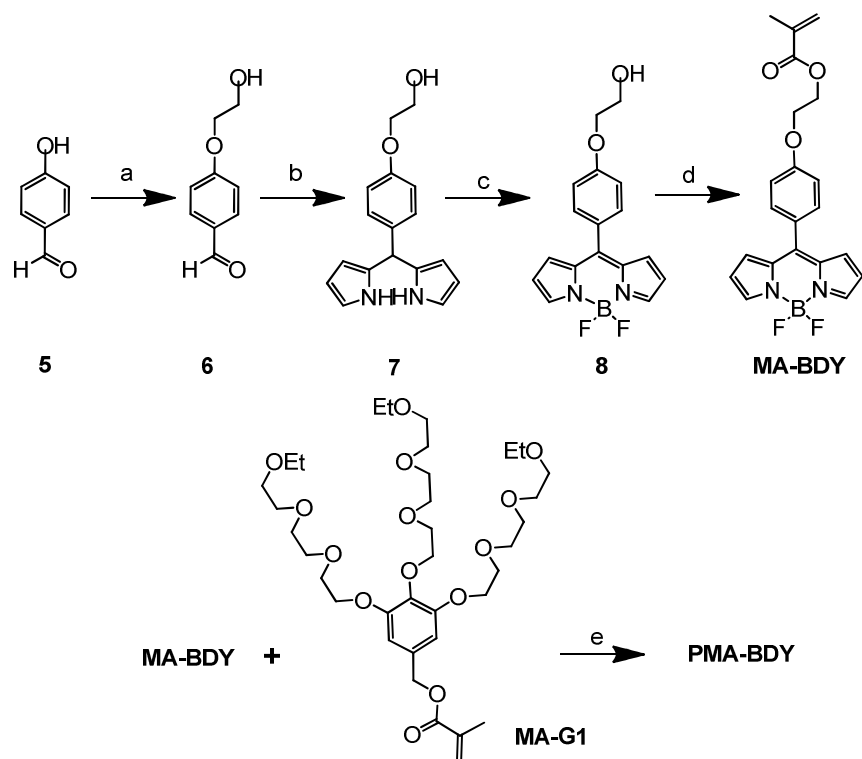

**Scheme S1.** Reagents and reaction conditions: (a) **5**, 2-bromoethanol, DMF, K<sub>2</sub>CO<sub>3</sub>, 150 °C, 24 h (47%); (b) **6**, TFA, pyrrole, rt, 21 h (41%); (c) **7**, *p*-chloranil, DCM, 0 °C - rt, 12 h; (d) DIPEA, BF<sub>3</sub>·OEt<sub>2</sub>, rt, 52 h (36%, two steps); (e) **8**, MAC, TEA, 0 °C - rt, 12 h (59%); (f) **MA-G1**, **MA-BDY**, AIBN, DMF, 70 °C, 25 h, (55%). DMF = dimethylformamide, DIPEA = diisopropylethylamine, AIBN = azobis(isobutyronitrile), MAC = methacryloyl chloride, TFA = trifluoroacetic acid.

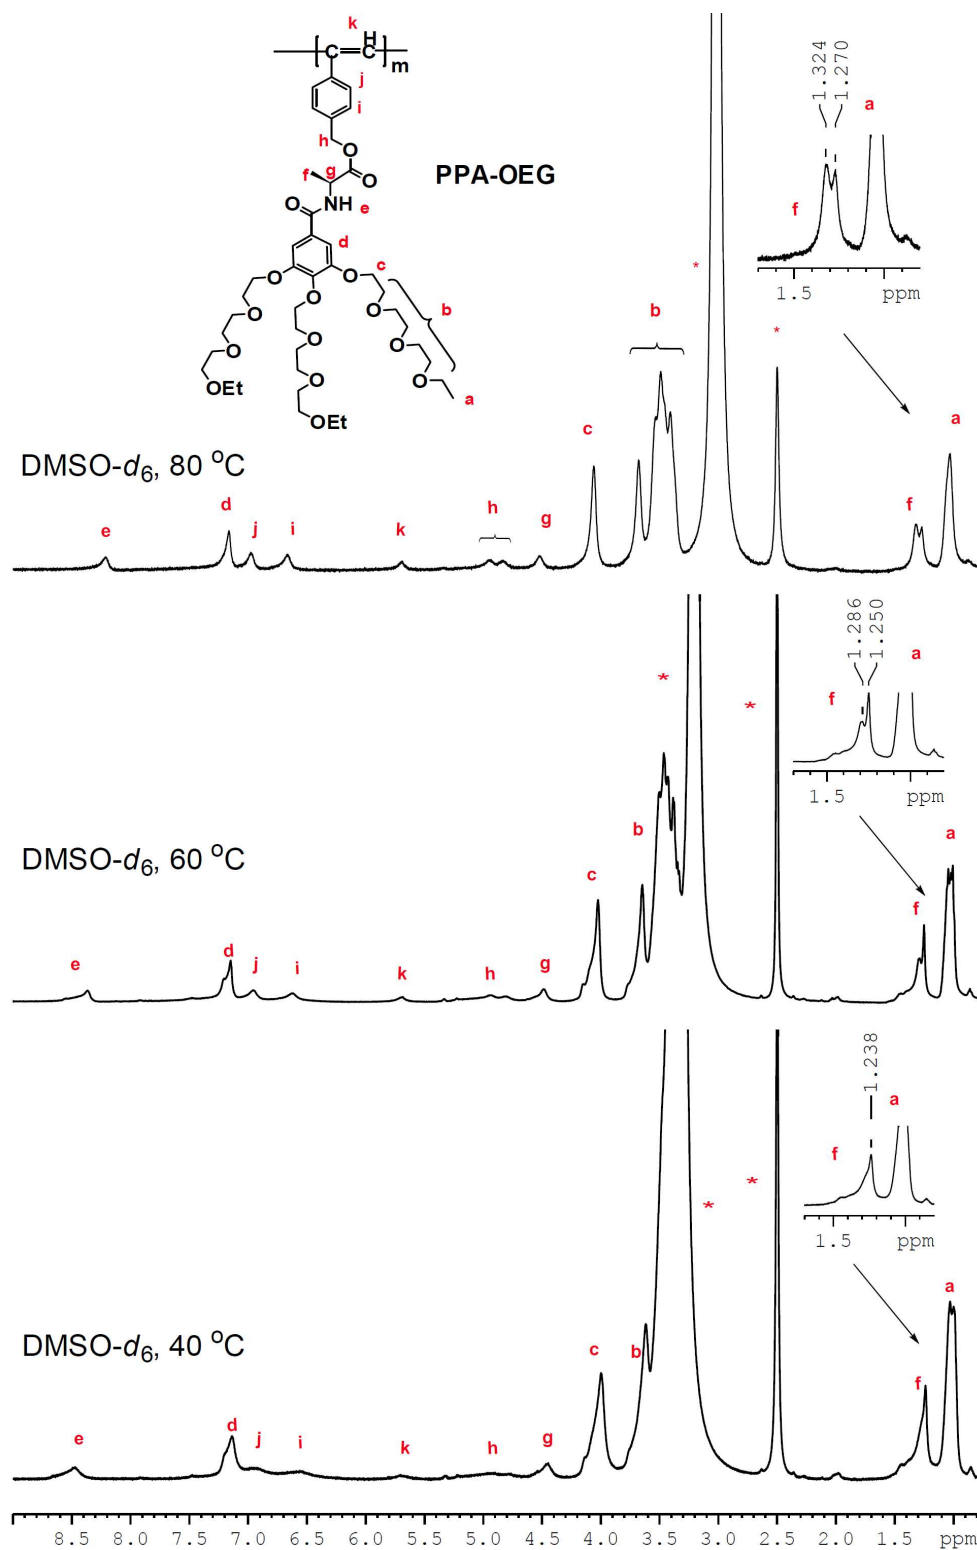

**Figure S1.**  $^1\text{H}$  NMR spectra of **PPA-OEG** in  $\text{DMSO-}d_6$  at 40, 60 and 80  $^\circ\text{C}$ , respectively.

The solvent peaks are marked with asterisks.

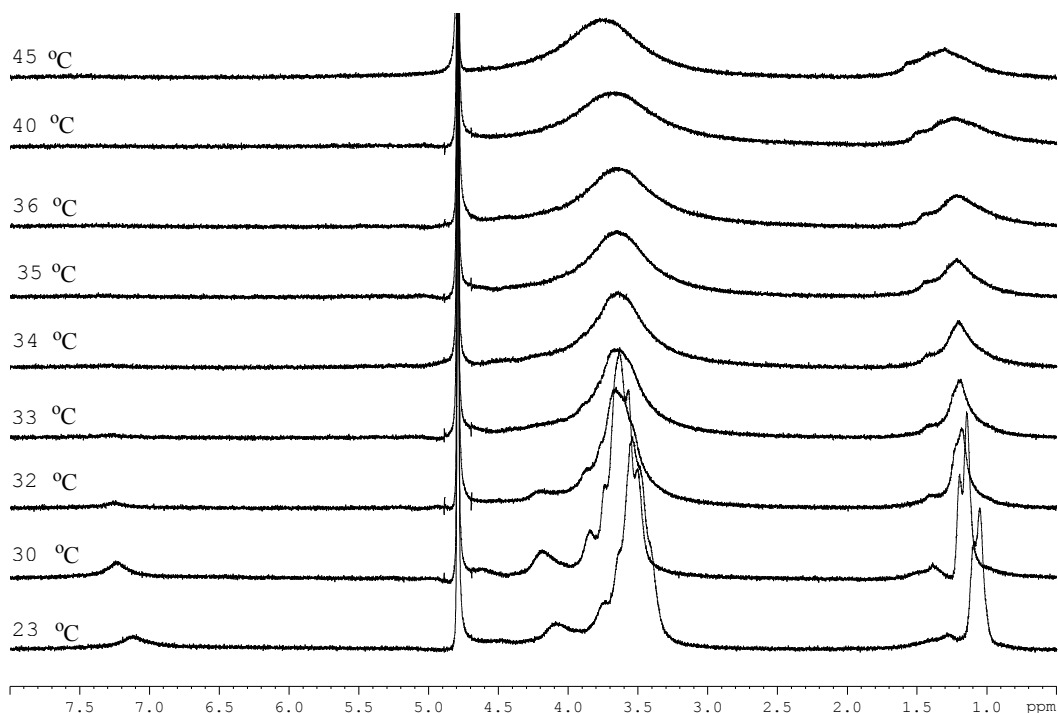

**Figure S2.** Temperature-varied  $^1\text{H}$  NMR spectra of **PPA-BDY** (0.31 wt %) in  $\text{D}_2\text{O}$  ( $T_{\text{cp}} = 33.9\text{ }^\circ\text{C}$ ).

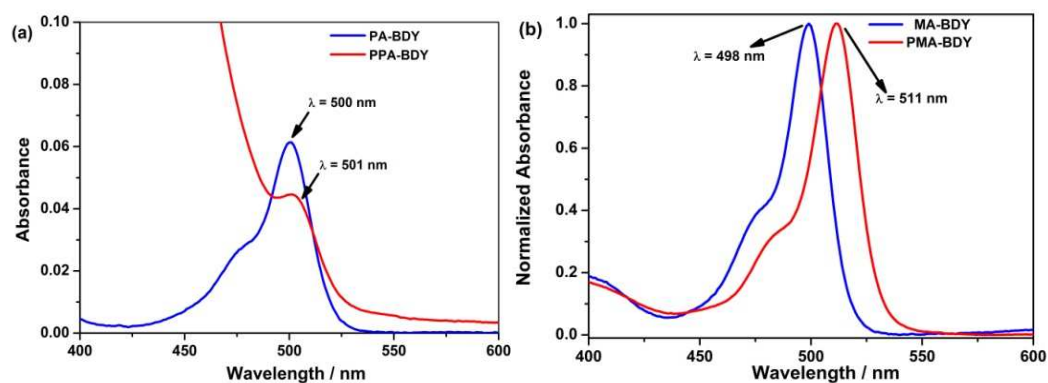

**Figure S3.** (a) Absorption spectra of **PA-BDY** ( $1.13 \times 10^{-6} \text{ mol}\cdot\text{L}^{-1}$ ) and **PPA-BDY** ( $0.56 \text{ mg}\cdot\text{mL}^{-1}$ ) in methanol at  $25\text{ }^\circ\text{C}$ . (b) Normalized absorption spectra of aliphatic monomer **MA-BDY** ( $2.09 \times 10^{-5} \text{ mol}\cdot\text{L}^{-1}$ ) and **PMA-BDY** ( $0.50 \text{ mg}\cdot\text{mL}^{-1}$ ) in DCM at  $25\text{ }^\circ\text{C}$

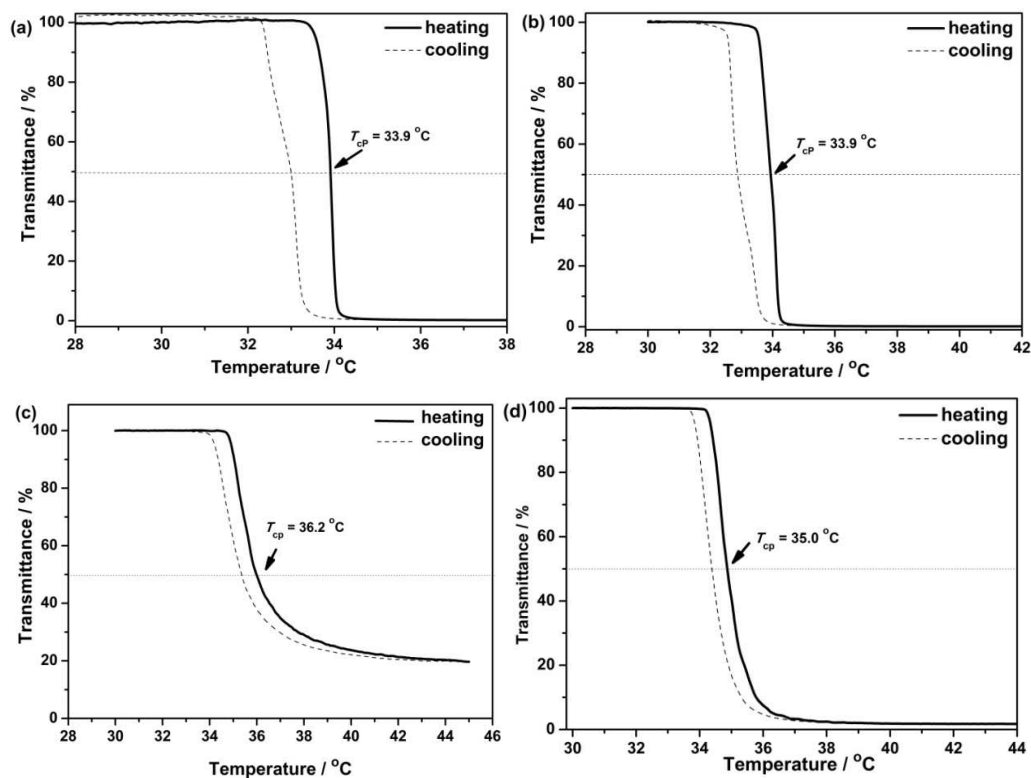

**Figure S4.** Turbidity curves for **PPA-OEG** (a, 0.40 wt %) and **PPA-BDY** (b, 0.31 wt %) in  $D_2O$ , and for **PPA-BDY** (c, 0.025 wt %) and **PMA-BDY** (d, 0.10 wt %) in  $H_2O$ .

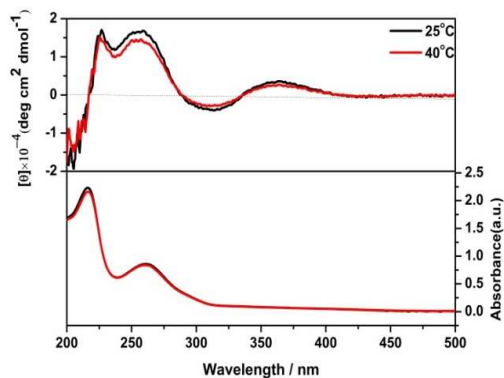

**Figure S5.** CD and UV/vis spectra for **PPA-OEG** (0.060 wt %) in methanol at 25 °C and 40 °C, respectively.



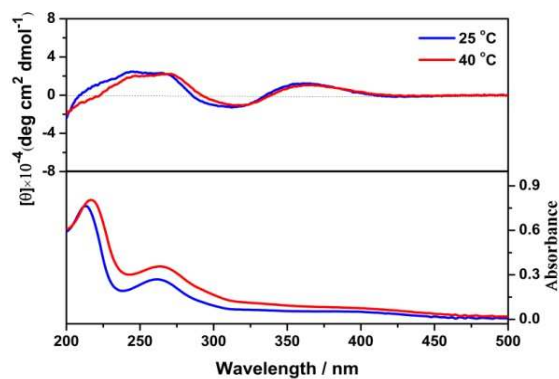

**Figure S6.** CD and UV/vis spectra for **PPA-OEG** (0.025 wt %) aqueous solution at 25 °C and 40 °C. The sample was kept at room temperature for 3 days before measurements.

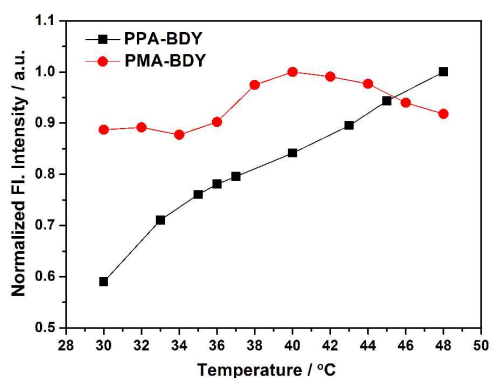

**Figure S7.** Plots of normalized fluorescence intensity for **PPA-BDY** at 522 nm and **PMA-BDY** at 524 nm versus temperature.

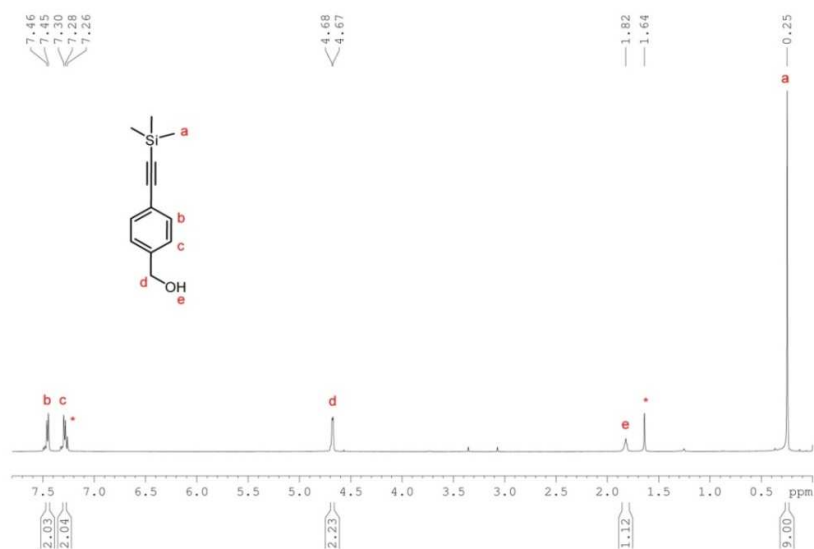

**Figure S8.**  $^1\text{H}$  NMR spectrum of compound **2** in  $\text{CDCl}_3$ . The solvent peaks are marked with asterisk (\*).

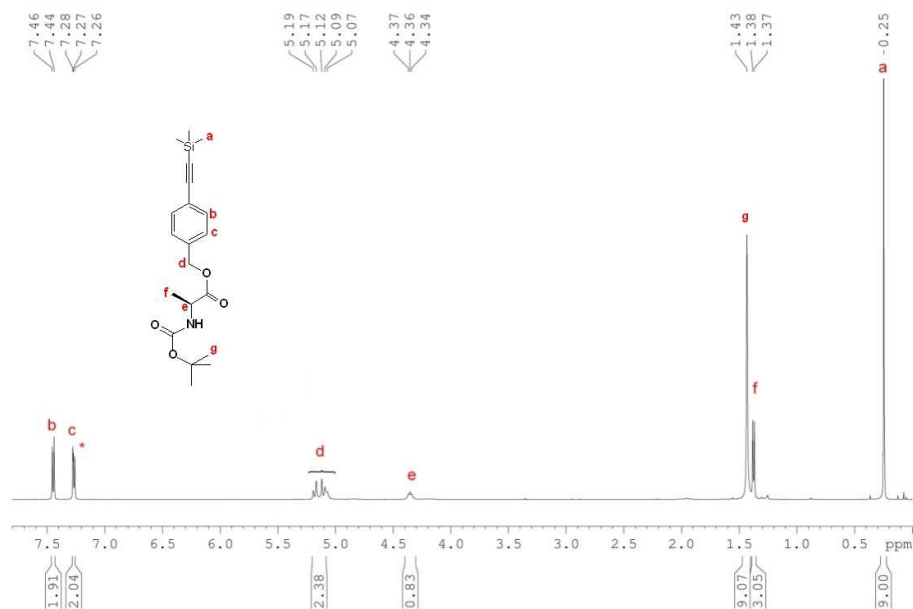

**Figure S9.** <sup>1</sup>H NMR spectrum of compound **3** in CDCl<sub>3</sub>. The solvent peak is marked with asterisk (\*).

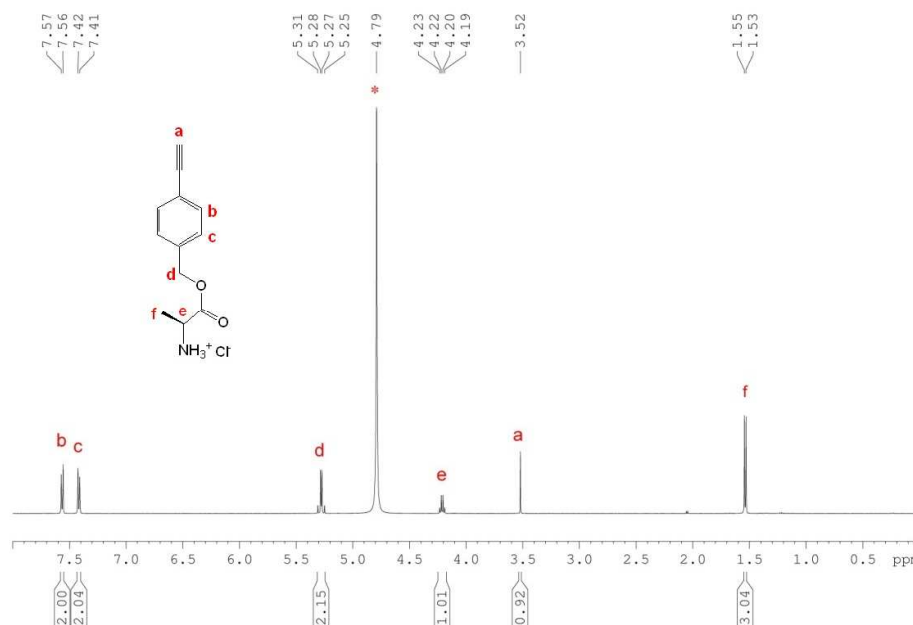

**Figure S10.** <sup>1</sup>H NMR spectrum of compound **4** in D<sub>2</sub>O. The solvent peak is marked with asterisk (\*).

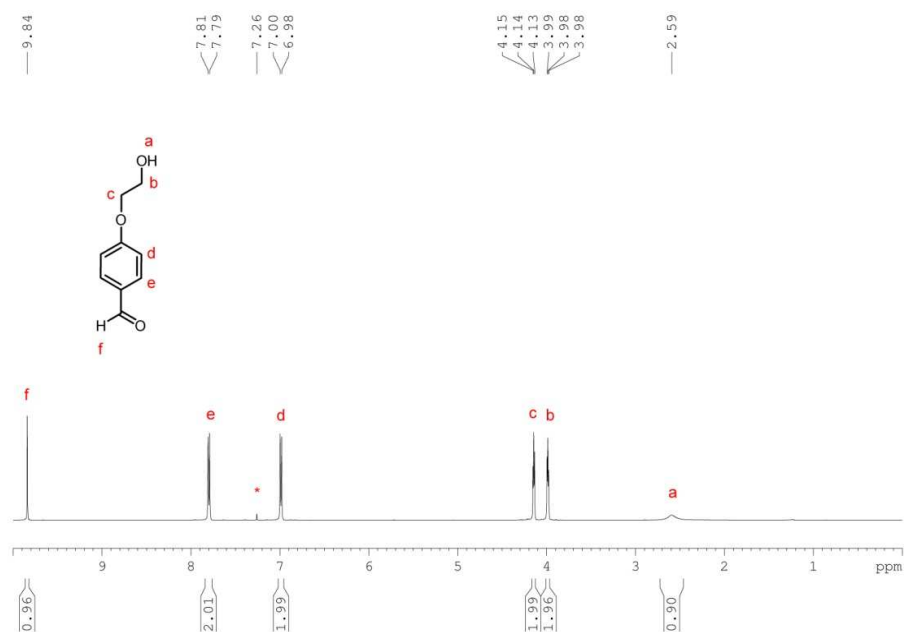

**Figure S11.** <sup>1</sup>H NMR spectrum of compound **6** in CDCl<sub>3</sub>. The solvent peak is marked with asterisk (\*).

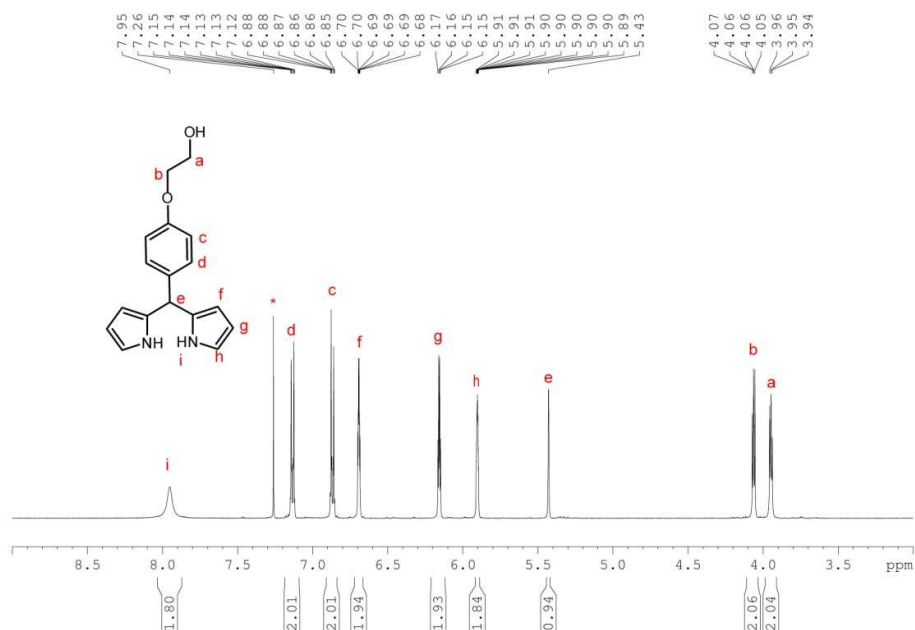

**Figure S12.** <sup>1</sup>H NMR spectrum of compound **7** in CDCl<sub>3</sub>. The solvent peak is marked with asterisk (\*).

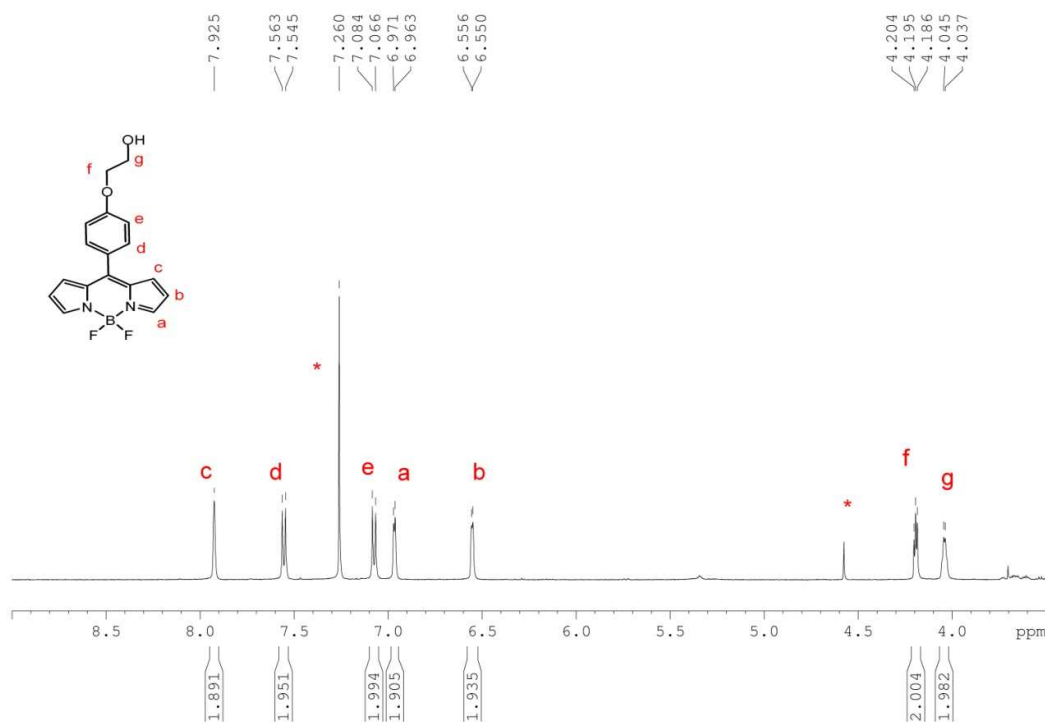

**Figure S13.**  $^1\text{H}$  NMR spectrum of compound **8** in  $\text{CDCl}_3$ . The solvent peaks are marked with asterisk (\*).

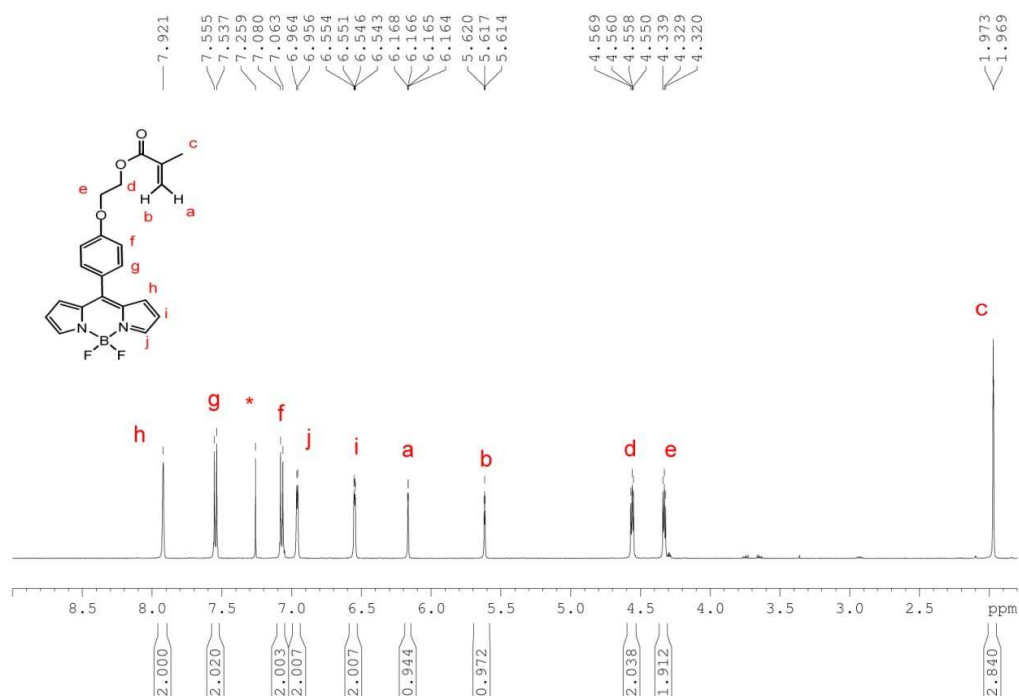

**Figure S14.**  $^1\text{H}$  NMR spectrum of monomer **MA-BDY** in  $\text{CDCl}_3$ . The solvent peak is marked with asterisk (\*).

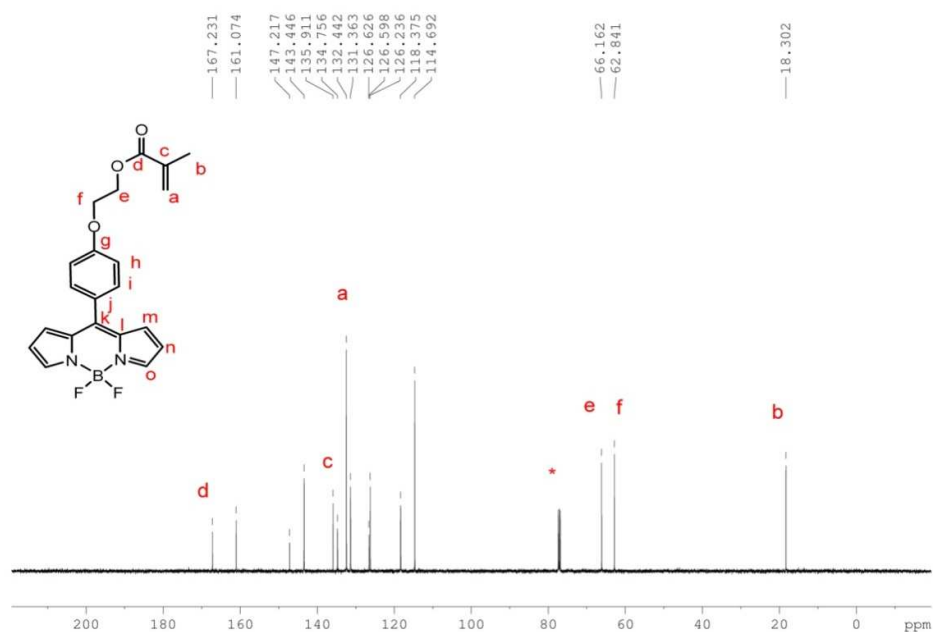

**Figure S15.**  $^{13}\text{C}$  NMR spectrum of monomer **MA-BDY** in  $\text{CDCl}_3$ . The solvents peak is marked with asterisk (\*). The aromatic peaks are not assigned in this spectrum.

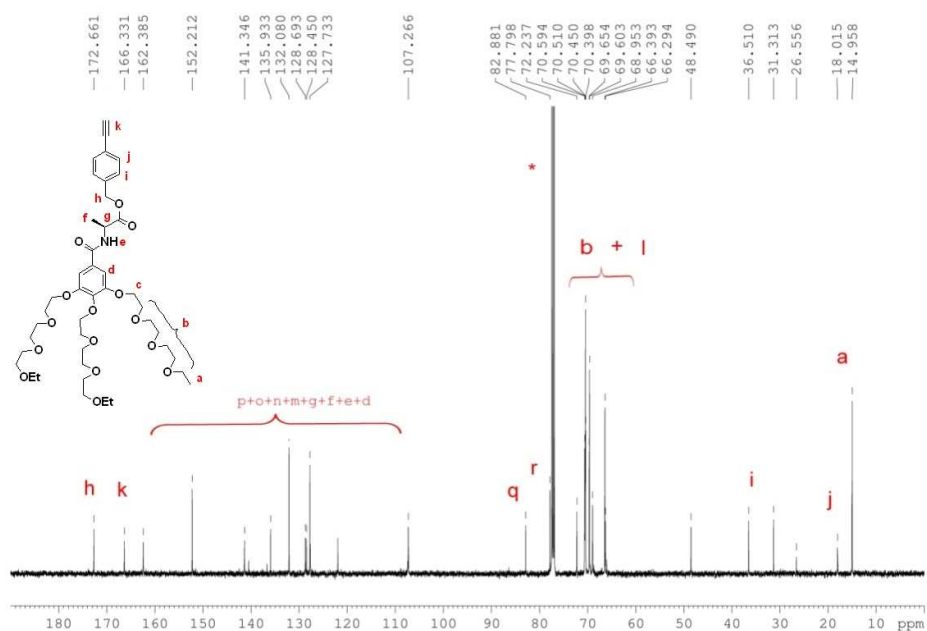

**Figure S16.**  $^{13}\text{C}$  NMR spectrum of **PA-OEG** in  $\text{CDCl}_3$ . The solvent peak is marked with asterisk (\*).

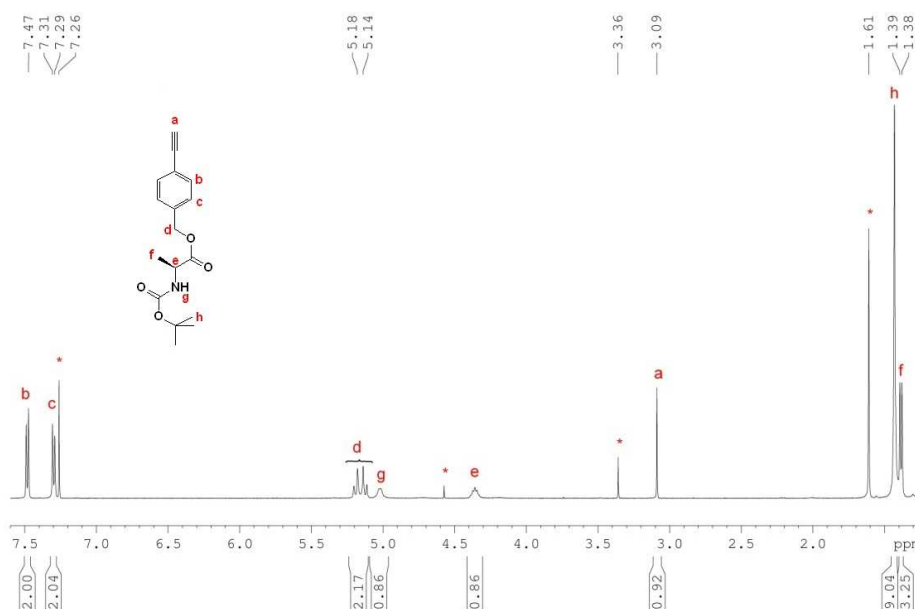

**Figure S17.**  $^1\text{H}$  NMR spectrum of **PA-Boc** in  $\text{CDCl}_3$ . The solvent peaks are marked with asterisk (\*).

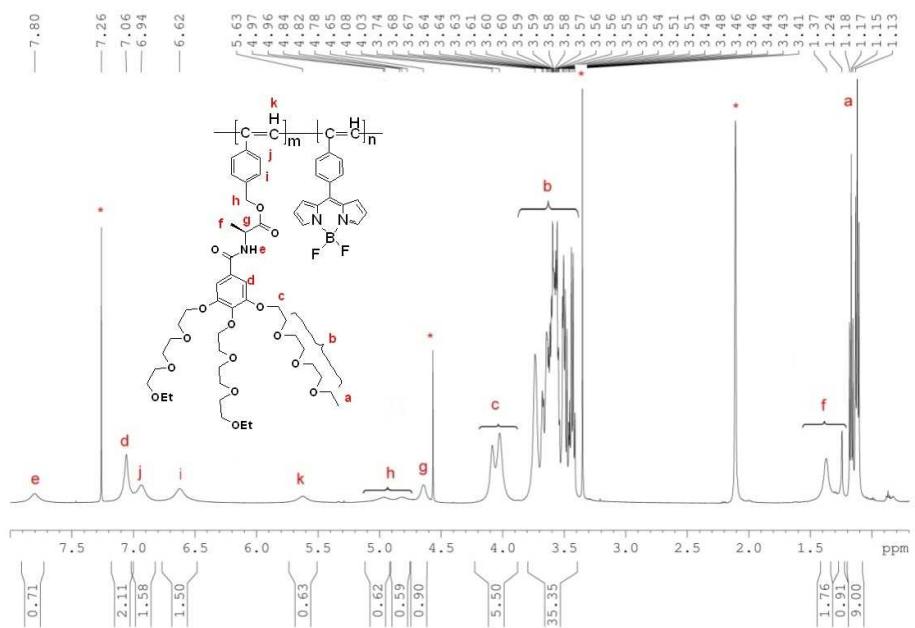

**Figure S18.**  $^1\text{H}$  NMR spectrum of **PPA-BDY** in  $\text{CDCl}_3$  at  $50\text{ }^\circ\text{C}$ . The solvent peaks are marked with asterisk (\*).

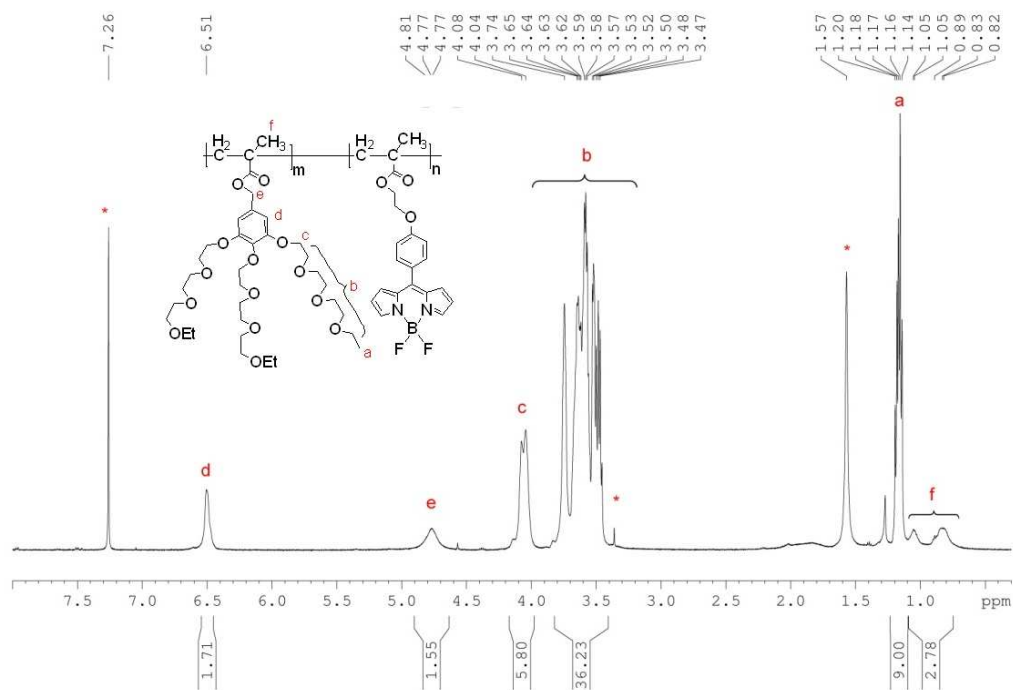

**Figure S19.**  $^1\text{H}$  NMR spectrum of **PMA-BDY** in  $\text{CDCl}_3$  at  $50\text{ }^\circ\text{C}$ . The solvent peaks are marked with asterisk (\*).
